# Supplementary material for: The Quality of Sequence Data Affects Biodiversity and Conservation Perspectives in the Neotropical Damselfly Megaloprepus caerulatus
Source: MDPI journal article supplement (doi:10.3390/d14121056), 2022-12-01
Supplement: s1 [file s1]

**Table S2:** Genetic distances (Kimura 2-parameter (K2P) model) between and within (grey) populations of *Megaloprepus* (all bold) and as a measure of gene flow between populations the  $F_{ST}$ -values (italics) are shown on the upper right. The analysis has been performed for 16S rRNA (Alignment 1: N = 49, 577 bp; Alignment 2: N = 39, 325 bp; Alignment 3: N = 145, 321 bp) and CO1 (Alignment 1: N = 61, 419 bp; Alignment 2: N = 29, 395 bp; Alignment 3: N = 135, 395 bp).

| 16S rRNA     |      |       |       |       |       |       |       |       | COI*  |       |       |       |       |       |       |       |
|--------------|------|-------|-------|-------|-------|-------|-------|-------|-------|-------|-------|-------|-------|-------|-------|-------|
| Alignment 1* |      | BCI   | RBLT  | LS    | CAN   | HN    | NI    | NI-b  |       | BCI   | CNP   | RBLT  | LS    | CAN   | NI    | NI-b  |
|              | BCI  | 1.75  | 0.74* | 0.61* | 0.26  | 0.18  | 0.74* | 0.28  | BCI   | 0.07  | /     | /     | /     | /     | /     | /     |
|              | RBLT | 5.56  | 0.58  | 0.93* | 0.87  | 0.88  | 0.88* | 0.85* | CNP   | 10.15 | 0.09  | /     | /     | /     | /     | /     |
|              | LS   | 2.32  | 4.89  | 0.28  | -0.33 | 0.93  | 0.89* | 0.22  | RBLT  | 9.38  | 10.46 | 0.54  | /     | /     | /     | /     |
|              | CAN  | 2.20  | 4.74  | 0.14  | 0.00  | 1.00  | 0.84* | 0.00  | LS    | 1.67  | 11.46 | 9.29  | 0.74  | /     | /     | /     |
|              | HN   | 1.86  | 4.92  | 2.30  | 2.21  | n/c   | 0.89  | 0.85  | CAN   | 2.38  | 11.63 | 9.31  | 1.27  | 0.51  | /     | /     |
|              | NI   | 10.71 | 10.17 | 11.09 | 10.94 | 4.06  | 0.54  | 0.83* | NI    | 10.74 | 1.83  | 9.33  | 12.02 | 12.19 | 0.46  | /     |
|              | NI-b | 8.29  | 11.03 | 6.64  | 6.50  | 2.57  | 5.84  | 0.85  | NI-b  | 1.71  | 11.19 | 9.01  | 0.75  | 0.64  | 11.78 | 0.76  |
| Alignment 2  |      | BCI   | RBLT  | LS    | CAN   | NI    | NI-b  |       | BCI   | RBLT  | LS    | CAN   | NI    | NI-b  | CNP   |       |
|              | BCI  | 0.31  | 0.95* | 0.86* | 0.78  | 0.98* | 0.82  | BCI   | 0.17  | 0.98  | 0.85* | 0.92  | 1.00* | 0.88  | 0.99* |       |
|              | RBLT | 4.89  | 0.00  | 0.96* | 1.00  | 1.00* | 1.00  | RBLT  | 9.43  | n/c   | 0.97  | 1.00  | 1.00  | 1.00  | 1.00  |       |
|              | LS   | 1.95  | 5.45  | 0.08  | -0.30 | 0.97* | 0.12  | LS    | 1.51  | 8.97  | 0.26  | 0.60  | 0.99  | -1.00 | 0.99* |       |
|              | CAN  | 1.90  | 5.40  | 0.04  | n/c   | 1.00  | 1.00  | CAN   | 2.18  | 8.97  | 0.64  | n/c   | 1.00* | 1.00  | 1.00  |       |
|              | NI   | 4.44  | 5.38  | 5.38  | 5.33  | 0.00  | 1.00* | NI    | 10.41 | 9.12  | 10.36 | 11.36 | 0.00  | 1.00  | 1.00* |       |
|              | NI-b | 1.91  | 5.40  | 0.04  | 0.00  | 5.33  | 0.00  | NI-b  | 1.38  | 8.97  | 0.13  | 0.77  | 11.36 | n/c   | 1.00  |       |
|              | CNP  |       |       |       |       |       |       | CNP   | 10.02 | 10.50 | 10.96 | 10.96 | 1.56  | 10.96 | 0.00  |       |
| Alignment 3  |      | BCI   | RBLT  | LS    | CAN   | NI    | NI-b  | CNP   |       | BCI   | RBLT  | LS    | CAN   | NI    | NI-b  | CNP   |
|              | BCI  | 0.18  | 0.95* | 0.85* | 0.88  | 0.96* | 0.87  | 0.97* | BCI   | 0.20  | 0.97* | 0.92* | 0.91  | 0.98* | 0.86  | 0.99* |
|              | RBLT | 4.68  | 0.10  | 0.95* | 0.97  | 0.98* | 0.97  | 0.98* | RBLT  | 9.14  | 0.28  | 0.98* | 0.96  | 0.98* | 0.96  | 0.99* |
|              | LS   | 1.81  | 5.22  | 0.06  | 0.40  | 0.96* | 0.21  | 0.96* | LS    | 1.43  | 8.65  | 0.04  | 0.94  | 1.00* | -1.00 | 1.00* |
|              | CAN  | 1.78  | 5.18  | 0.04  | n/c   | 1.00  | 1.00  | 1.00* | CAN   | 2.21  | 8.65  | 0.75  | n/c   | 1.00  | 1.00  | 1.00  |
|              | NI   | 4.53  | 5.16  | 5.45  | 5.40  | 0.00  | 1.00  | 0.99* | NI    | 10.44 | 9.07  | 11.36 | 11.36 | 0.00  | 1.00  | 1.00* |
|              | NI-b | 1.78  | 5.18  | 0.04  | 0.00  | 5.40  | 0.00  | 1.00* | NI-b  | 1.41  | 8.65  | 0.02  | 0.77  | 11.36 | n/c   | 1.00  |
|              | CNP  | 4.54  | 5.18  | 5.10  | 5.06  | 1.30  | 5.06  | 0.02  | CNP   | 10.06 | 10.44 | 10.96 | 10.96 | 1.56  | 10.96 | 0.00  |

\* The  $F_{ST}$ -values for the CO1 Alignment 1 are missing as the alignment could not be analyzed in Arlequin.

\*\* Sampling localities from north to south are: RBLT (Biosphere Reserve Los Tuxtlas, Veracruz, Mexico), HN (Cusuco National Park, Honduras), NI (El Jaguar reserve, Nicaragua), NI-b Biological Reserve Indio Maíz “Bartola Reserve”, Nicaragua, LS (Biological Research Station La Selva, Costa Rica), CNP (Corcovado National Park “Sirena Field Station”, Costa Rica), BCI (Barro Colorado Island, Panama) and CAN (Rio Canande Reserve, Esmeraldas Province, Ecuador).
