# Supplementary material for: The Quality of Sequence Data Affects Biodiversity and Conservation Perspectives in the Neotropical Damselfly Megaloprepus caerulatus
Source: MDPI journal article supplement (doi:10.3390/d14121056), 2022-12-01
Supplement: s1 [file s1]

**Table S1:** Overview of species ID's, sampling localities, and NCBI Accession numbers used for the present study. For the phylogeny *Coryphagrion grandis*, *Mecistogaster linearis* and *Mecistogaster lucretia* were used as outgroups.

<sup>1</sup> Sampling localities from north to south are: RBLT (Biosphere Reserve Los Tuxtlas, Veracruz, Mexico), HN (Cusuco National Park, Honduras), NI (El Jaguar reserve, Nicaragua), NI-b Biological Reserve Indio Maíz "Bartola Reserve", Nicaragua, LS (Biological Research Station La Selva, Costa Rica), CNP (Corcovado National Park "Sirena Field Station", Costa Rica), BCI (Barro Colorado Island, Panama) and CAN (Rio Canande Reserve, Esmeraldas Province, Ecuador).

<sup>2</sup> Because 16S rDNA was obtained directly as a sequence file from Fincke et al. and the sequences are not published in NCBI only presence can be described.

<sup>3</sup> Ingroup: Sequences originate from Fincke et al. 2018; Comparison group: Sequences originate from Feindt et al. 2014 and are partly unpublished.

<sup>4</sup> NI-b: According to our in-house barcodes this individual belongs to the Bartola Region.

| Species ID                     | Sampling locality <sup>1</sup> | Species              | CO1                   |                                      | 16S rRNA                                                   |                            |
|--------------------------------|--------------------------------|----------------------|-----------------------|--------------------------------------|------------------------------------------------------------|----------------------------|
|                                |                                |                      | NCBI accession number | Comments                             | Available (yes / no) <sup>2</sup><br>NCBI accession number | Comments                   |
| Ingroup <sup>3</sup> = Study A |                                |                      |                       |                                      |                                                            |                            |
| RU_615                         | BCI                            | <i>M. caerulatus</i> | MH998528              | Removed due to short sequence length | yes                                                        | Removed due to low quality |
| RU_616                         | BCI                            | <i>M. caerulatus</i> | MH998529              |                                      | yes                                                        | Removed due to low quality |
| RU_617                         | BCI                            | <i>M. caerulatus</i> | MH998530              | Removed due to short sequence length | yes                                                        |                            |
| RU_628                         | BCI                            | <i>M. caerulatus</i> | MH998531              | Removed due to short sequence length | yes                                                        |                            |
| RU_633                         | BCI                            | <i>M. caerulatus</i> | MH998532              | Removed due to short sequence length | yes                                                        |                            |
| RU_679                         | BCI                            | <i>M. caerulatus</i> | MH998533              |                                      | no                                                         |                            |
| RU_680                         | BCI                            | <i>M. caerulatus</i> | MH998534              | Removed due to low quality           | no                                                         |                            |
| RU_681                         | BCI                            | <i>M. caerulatus</i> | MH998535              | Removed due to low quality           | no                                                         |                            |
| RU_683A                        | BCI                            | <i>M. caerulatus</i> | MH998536              | Removed due to low quality           | no                                                         |                            |
| RU_683b                        | BCI                            | <i>M. caerulatus</i> | MH998537              | Removed due to low quality           | yes                                                        |                            |
| RU_684                         | BCI                            | <i>M. caerulatus</i> | MH998538              |                                      | no                                                         |                            |
| RU_687                         | CNP                            | <i>M. caerulatus</i> | MH998539              |                                      | no                                                         |                            |
| RU_688                         | CNP                            | <i>M. caerulatus</i> | MH998540              | Removed due to low quality           | no                                                         |                            |
| RU_689                         | CNP                            | <i>M. caerulatus</i> | MH998541              | Removed due to low quality           | no                                                         |                            |
| RU_703                         | CNP                            | <i>M. caerulatus</i> | MH998542              |                                      | no                                                         |                            |
| RU_704                         | CNP                            | <i>M. caerulatus</i> | MH998543              | Removed due to low quality           | no                                                         |                            |
| RU_706                         | CNP                            | <i>M. caerulatus</i> | MH998544              | Removed due to low quality           | no                                                         |                            |

|        |      |                      |          |                            |     |                                       |
|--------|------|----------------------|----------|----------------------------|-----|---------------------------------------|
| RU_707 | CNP  | <i>M. caerulatus</i> | MH998545 | Removed due to low quality | no  |                                       |
| RU_708 | CNP  | <i>M. caerulatus</i> | MH998546 |                            | no  |                                       |
| RU_709 | CNP  | <i>M. caerulatus</i> | MH998547 |                            | no  |                                       |
| RU_710 | CNP  | <i>M. caerulatus</i> | MH998548 |                            | no  |                                       |
| RU_711 | CNP  | <i>M. caerulatus</i> | MH998549 |                            | no  |                                       |
| RU_735 | RBLT | <i>M. caerulatus</i> | MH998550 | Removed due to low quality | yes |                                       |
| RU_739 | RBLT | <i>M. caerulatus</i> | MH998551 | Removed due to low quality | yes |                                       |
| RU_740 | RBLT | <i>M. caerulatus</i> | MH998552 |                            | yes |                                       |
| RU_741 | RBLT | <i>M. caerulatus</i> | MH998553 | Removed due to low quality | yes |                                       |
| RU_833 | LS   | <i>M. caerulatus</i> | MH998554 |                            | yes |                                       |
| RU_835 | LS   | <i>M. caerulatus</i> | MH998555 | Removed due to low quality | yes |                                       |
| RU_836 | LS   | <i>M. caerulatus</i> | MH998556 | Removed due to low quality | yes |                                       |
| RU_837 | LS   | <i>M. caerulatus</i> | MH998557 | Removed due to low quality | yes | Removed due to low quality            |
| RU_840 | LS   | <i>M. caerulatus</i> | MH998558 |                            | yes |                                       |
| RU_842 | LS   | <i>M. caerulatus</i> | MH998559 | Removed due to low quality | yes |                                       |
| RU_843 | LS   | <i>M. caerulatus</i> | MH998560 | Removed due to low quality | yes |                                       |
| RU_844 | LS   | <i>M. caerulatus</i> | MH998561 | Removed due to low quality | yes |                                       |
| RU_845 | LS   | <i>M. caerulatus</i> | MH998562 | Removed due to low quality | yes | Removed due to uncertain base calling |
| RU_846 | LS   | <i>M. caerulatus</i> | MH998563 | Removed due to low quality | yes |                                       |
| RU_847 | LS   | <i>M. caerulatus</i> | MH998564 | Removed due to low quality | yes | Removed due to uncertain base calling |
| RU_848 | LS   | <i>M. caerulatus</i> | MH998565 | Removed due to low quality | yes |                                       |
| RU_849 | LS   | <i>M. caerulatus</i> | MH998566 |                            | yes |                                       |
| RU_851 | LS   | <i>M. caerulatus</i> | MH998567 | Removed due to low quality | yes |                                       |
| RU_852 | LS   | <i>M. caerulatus</i> | MH998568 | Removed due to low quality | yes |                                       |
| RU_861 | LS   | <i>M. caerulatus</i> | MH998569 | Removed due to low quality | yes |                                       |
| RU_862 | LS   | <i>M. caerulatus</i> | MH998570 | Removed due to low quality | yes |                                       |
| RU_866 | CAN  | <i>M. caerulatus</i> | MH998571 | Removed due to low quality | yes |                                       |
| RU_874 | CAN  | <i>M. caerulatus</i> | MH998572 |                            | yes | Removed due to uncertain base calling |
| RU_875 | LS   | <i>M. caerulatus</i> | MH998573 |                            | yes |                                       |

|                  |      |                      |          |                                      |     |                                                        |
|------------------|------|----------------------|----------|--------------------------------------|-----|--------------------------------------------------------|
| RU_631           | HN   | <i>M. caerulatus</i> | MH998574 | Removed due to short sequence length | yes | Removed due to internal gaps and short sequence length |
| RU_632           | BCI  | <i>M. caerulatus</i> | MH998575 | Removed due to short sequence length | yes | Removed due to internal gaps and short sequence length |
| RU_718           | LS   | <i>M. caerulatus</i> | MH998576 |                                      | no  |                                                        |
| RU_719           | LS   | <i>M. caerulatus</i> | MH998577 |                                      | no  |                                                        |
| RU_803           | RBLT | <i>M. caerulatus</i> | MH998578 | Removed due to low quality           | yes | Removed due to internal gaps and short sequence length |
| RU_831           | LS   | <i>M. caerulatus</i> | MH998579 | Removed due to low quality           | yes |                                                        |
| 519_MC_Nicaragua | NI   | <i>M. caerulatus</i> | MH998580 |                                      | yes |                                                        |
| 520_MC_Nicaragua | NI   | <i>M. caerulatus</i> | MH998581 |                                      | yes |                                                        |
| 531_MC_Nicaragua | NI   | <i>M. caerulatus</i> | MH998582 | Removed due to low quality           | yes |                                                        |
| 532_MC_Nicaragua | NI   | <i>M. caerulatus</i> | MH998583 | Removed due to low quality           | yes |                                                        |
| 534_MC_Nicaragua | NI   | <i>M. caerulatus</i> | MH998584 |                                      | yes |                                                        |
| 533_MC_Nicaragua | NI   | <i>M. caerulatus</i> | MH998585 | Removed due to low quality           | yes | Removed due to short sequence length                   |
| 523_mc_Nicaragua | NI   | <i>M. caerulatus</i> | MH998587 |                                      | yes |                                                        |
| 513_mc_Nicaragua | NI   | <i>M. caerulatus</i> | MH998588 |                                      | yes |                                                        |
| 522_mc_Nicaragua | NI   | <i>M. caerulatus</i> | MH998589 |                                      | yes |                                                        |
| 518_mc_Nicaragua | NI   | <i>M. caerulatus</i> | MH998590 |                                      | yes |                                                        |
| 521_mc_Nicaragua | NI   | <i>M. caerulatus</i> | MH998591 |                                      | yes |                                                        |
| 527_mc_Nicaragua | NI   | <i>M. caerulatus</i> | MH998592 |                                      | yes |                                                        |

|                                         |                   |                      |          |                            |                                                                                               |
|-----------------------------------------|-------------------|----------------------|----------|----------------------------|-----------------------------------------------------------------------------------------------|
| 528_mc_Nicaragua                        | NI                | <i>M. caerulatus</i> | MH998593 | yes                        | Sequences were not included, because they are not listed in Study-A species list nor on NCBI. |
| 525_mc_Nicaragua                        | NI                | <i>M. caerulatus</i> | MH998594 | yes                        |                                                                                               |
| 200_MC_Nicaragua                        | NI-b <sup>4</sup> | <i>M. caerulatus</i> | MH998586 | Removed due to low quality |                                                                                               |
| OF_137_Nicaragua                        | NI-b <sup>4</sup> | <i>M. caerulatus</i> | MH998595 | yes                        |                                                                                               |
| RU_621                                  | n.a.              | ?                    | n.a.     | yes                        |                                                                                               |
| RU_828                                  | n.a.              | ?                    | n.a.     | yes                        |                                                                                               |
| RU_829                                  | n.a.              | ?                    | n.a.     | yes                        |                                                                                               |
| RU_613_Honduras                         | n.a.              | ?                    | n.a.     | yes                        |                                                                                               |
| 530_MC_Nicaragua                        | n.a.              | ?                    | n.a.     | yes                        |                                                                                               |
| 529_MC_Nicaragua                        | n.a.              | ?                    | n.a.     | yes                        |                                                                                               |
| Comparison group <sup>3</sup> = Study B |                   |                      |          |                            |                                                                                               |
| BCI1                                    | BCI               | <i>M. caerulatus</i> | MH939693 | KF895130                   |                                                                                               |
| BCI2                                    | BCI               | <i>M. caerulatus</i> | MH939694 | KF895131                   |                                                                                               |
| BCI3                                    | BCI               | <i>M. caerulatus</i> | MH939695 | KF895132                   |                                                                                               |
| BCI4                                    | BCI               | <i>M. caerulatus</i> | MH939696 | KF895133                   |                                                                                               |
| BCI5                                    | BCI               | <i>M. caerulatus</i> | MH939697 | KF895134                   |                                                                                               |
| BCI6                                    | BCI               | <i>M. caerulatus</i> | MH939698 | KF895135                   |                                                                                               |
| BCI7                                    | BCI               | <i>M. caerulatus</i> | MH939699 | KF895136                   |                                                                                               |
| BCI8                                    | BCI               | <i>M. caerulatus</i> | MH939700 | KF895137                   |                                                                                               |
| BCI9                                    | BCI               | <i>M. caerulatus</i> | MH939701 | KF895138                   |                                                                                               |
| BCI10                                   | BCI               | <i>M. caerulatus</i> | MH939702 | KF895139                   |                                                                                               |
| BCI11                                   | BCI               | <i>M. caerulatus</i> | MH939703 | KF895140                   |                                                                                               |
| BCI12                                   | BCI               | <i>M. caerulatus</i> | MH939704 | KF895141                   |                                                                                               |
| BCI12_2                                 | BCI               | <i>M. caerulatus</i> | MH939705 | KF895142                   |                                                                                               |
| BCI14                                   | BCI               | <i>M. caerulatus</i> | MH939706 | KF895143                   |                                                                                               |
| BCI15                                   | BCI               | <i>M. caerulatus</i> | MH939707 | KF895144                   |                                                                                               |

|         |     |                      |          |          |
|---------|-----|----------------------|----------|----------|
| BCI16   | BCI | <i>M. caerulatus</i> | MH939708 | KF895145 |
| BCI17   | BCI | <i>M. caerulatus</i> | MH939709 | KF895146 |
| BCI19   | BCI | <i>M. caerulatus</i> | MH939710 | KF895148 |
| BCI20   | BCI | <i>M. caerulatus</i> | MH939711 | KF895149 |
| BCI22w  | BCI | <i>M. caerulatus</i> | MH939713 | KF895150 |
| BCI23   | BCI | <i>M. caerulatus</i> | MH939714 | KF895151 |
| BCI24   | BCI | <i>M. caerulatus</i> | MH939715 | KF895152 |
| BCI25   | BCI | <i>M. caerulatus</i> | MH939716 | KF895153 |
| BCI26   | BCI | <i>M. caerulatus</i> | MH939717 | KF895154 |
| BCI27   | BCI | <i>M. caerulatus</i> | MH939718 | KF895155 |
| BCI28   | BCI | <i>M. caerulatus</i> | MH939719 | KF895156 |
| BCI29   | BCI | <i>M. caerulatus</i> | MH939720 | KF895157 |
| BCI30   | BCI | <i>M. caerulatus</i> | MH939721 | KF895158 |
| BCI31   | BCI | <i>M. caerulatus</i> | MH939722 | KF895159 |
| CNP3    | CNP | <i>M. caerulatus</i> | MH939658 | KF895162 |
| CNP13_1 | CNP | <i>M. caerulatus</i> | MH939659 | KF895164 |
| CNP13_2 | CNP | <i>M. caerulatus</i> | MH939660 | KF895165 |
| CNP14   | CNP | <i>M. caerulatus</i> | MH939661 | KF895166 |
| CNP18   | CNP | <i>M. caerulatus</i> | MH939667 | KF895167 |
| CNP20   | CNP | <i>M. caerulatus</i> | MH939668 | KF895168 |
| CNP25   | CNP | <i>M. caerulatus</i> | MH939669 | KF895169 |
| CNP29   | CNP | <i>M. caerulatus</i> | MH939670 | KF895170 |
| CNP30   | CNP | <i>M. caerulatus</i> | MH939671 | KF895171 |
| CNP31   | CNP | <i>M. caerulatus</i> | MH939672 | KF895172 |
| CNP32   | CNP | <i>M. caerulatus</i> | MH939673 | KF895173 |
| CNP36   | CNP | <i>M. caerulatus</i> | MH939674 | KF895174 |
| CNP45   | CNP | <i>M. caerulatus</i> | MH939675 | KF895175 |
| CNP48   | CNP | <i>M. caerulatus</i> | MH939676 | KF895176 |
| CNP48_1 | CNP | <i>M. caerulatus</i> | MH939677 | KF895177 |
| CNP51_1 | CNP | <i>M. caerulatus</i> | MH939678 | KF895178 |
| CNP51_2 | CNP | <i>M. caerulatus</i> | MH939679 | KF895179 |

|          |     |                      |          |          |
|----------|-----|----------------------|----------|----------|
| CNP51_3  | CNP | <i>M. caerulatus</i> | MH939680 | KF895180 |
| CrCNPL3  | CNP | <i>M. caerulatus</i> | MH939688 | KF895181 |
| CrCNPL14 | CNP | <i>M. caerulatus</i> | MH939689 | KF895182 |
| CrCNPL15 | CNP | <i>M. caerulatus</i> | MH939690 | KF895183 |
| CrCNPL19 | CNP | <i>M. caerulatus</i> | MH939691 | KF895184 |
| CrCNPL20 | CNP | <i>M. caerulatus</i> | MH939692 | KF895185 |
| CNPMC5   | CNP | <i>M. caerulatus</i> | MH939681 | KF895186 |
| CNPMC7   | CNP | <i>M. caerulatus</i> | MH939682 | KF895187 |
| CNPMC9   | CNP | <i>M. caerulatus</i> | MH939683 | KF895188 |
| CNPMC10  | CNP | <i>M. caerulatus</i> | MH939684 | KF895189 |
| CNPMC11  | CNP | <i>M. caerulatus</i> | MH939685 | KF895190 |
| CNPMC13  | CNP | <i>M. caerulatus</i> | MH939687 | KF895191 |
| LS1      | LS  | <i>M. caerulatus</i> | MH939624 | KF895193 |
| LS2      | LS  | <i>M. caerulatus</i> | MH939625 | KF895194 |
| LS3      | LS  | <i>M. caerulatus</i> | MH939626 | KF895195 |
| LS4      | LS  | <i>M. caerulatus</i> | MH939627 | KF895196 |
| LS5      | LS  | <i>M. caerulatus</i> | MH939628 | KF895197 |
| LS6      | LS  | <i>M. caerulatus</i> | MH939629 | KF895198 |
| LS7      | LS  | <i>M. caerulatus</i> | MH939630 | KF895199 |
| LS8      | LS  | <i>M. caerulatus</i> | MH939631 | KF895200 |
| LS9      | LS  | <i>M. caerulatus</i> | MH939738 | KF895201 |
| LS10     | LS  | <i>M. caerulatus</i> | MH939632 | KF895202 |
| LS11     | LS  | <i>M. caerulatus</i> | MH939633 | KF895203 |
| LS12     | LS  | <i>M. caerulatus</i> | MH939634 | KF895204 |
| LS13     | LS  | <i>M. caerulatus</i> | MH939635 | KF895205 |
| LS15     | LS  | <i>M. caerulatus</i> | MH939637 | KF895206 |
| LS16     | LS  | <i>M. caerulatus</i> | MH939638 | KF895207 |
| LS17     | LS  | <i>M. caerulatus</i> | MH939639 | KF895208 |
| LS18     | LS  | <i>M. caerulatus</i> | MH939640 | KF895209 |
| LS19     | LS  | <i>M. caerulatus</i> | MH939641 | KF895210 |
| LS20     | LS  | <i>M. caerulatus</i> | MH939642 | KF895211 |

|                  |      |                      |          |          |
|------------------|------|----------------------|----------|----------|
| LS21             | LS   | <i>M. caerulatus</i> | MH939643 | KF895212 |
| LS22             | LS   | <i>M. caerulatus</i> | MH939644 | KF895213 |
| LS23             | LS   | <i>M. caerulatus</i> | MH939645 | KF895214 |
| LS24             | LS   | <i>M. caerulatus</i> | MH939646 | KF895215 |
| LS25             | LS   | <i>M. caerulatus</i> | MH939647 | KF895216 |
| LS26             | LS   | <i>M. caerulatus</i> | MH939648 | KF895217 |
| LS27             | LS   | <i>M. caerulatus</i> | MH939649 | KF895218 |
| LS28             | LS   | <i>M. caerulatus</i> | MH939650 | KF895219 |
| LS29             | LS   | <i>M. caerulatus</i> | MH939651 | KF895220 |
| LS30             | LS   | <i>M. caerulatus</i> | MH939652 | KF895221 |
| LS31             | LS   | <i>M. caerulatus</i> | MH939653 | KF895222 |
| LT1              | RBLT | <i>M. caerulatus</i> | MH939548 | KF895223 |
| LT2              | RBLT | <i>M. caerulatus</i> | MH939549 | KF895224 |
| LT3              | RBLT | <i>M. caerulatus</i> | MH939550 | KF895225 |
| LT4              | RBLT | <i>M. caerulatus</i> | MH939551 | KF895226 |
| LT6              | RBLT | <i>M. caerulatus</i> | MH939552 | KF895227 |
| LT7              | RBLT | <i>M. caerulatus</i> | MH939553 | KF895228 |
| LT10             | RBLT | <i>M. caerulatus</i> | MH939554 | KF895229 |
| LT13             | RBLT | <i>M. caerulatus</i> | MH939555 | KF895230 |
| LT14             | RBLT | <i>M. caerulatus</i> | MH939556 | KF895231 |
| LT15             | RBLT | <i>M. caerulatus</i> | MH939557 | KF895232 |
| LT16             | RBLT | <i>M. caerulatus</i> | MH939558 | KF895233 |
| LT17             | RBLT | <i>M. caerulatus</i> | MH939559 | KF895234 |
| LT18             | RBLT | <i>M. caerulatus</i> | MH939560 | KF895235 |
| LT19             | RBLT | <i>M. caerulatus</i> | MH939561 | KF895236 |
| LT20             | RBLT | <i>M. caerulatus</i> | MH939562 | KF895237 |
| LT21             | RBLT | <i>M. caerulatus</i> | MH939563 | KF895238 |
| MeLtL11          | RBLT | <i>M. caerulatus</i> | MH939566 | KF895239 |
| MeLtL17          | RBLT | <i>M. caerulatus</i> | MH939570 | KF895240 |
| Outgroup         |      |                      |          |          |
| CG84D &<br>CG84E | n.a. | <i>C. grandis</i>    | KC912402 | DQ642981 |

|                     |      |                    |          |          |
|---------------------|------|--------------------|----------|----------|
| RMNH.INS.50<br>1850 | n.a. | <i>M. linearis</i> | KF369435 | KF369773 |
| RMNH.INS.50<br>1805 | n.a. | <i>M. lucretia</i> | KF369436 | KF369774 |
