# Supplementary material for: The Quality of Sequence Data Affects Biodiversity and Conservation Perspectives in the Neotropical Damselfly Megaloprepus caerulatus
Source: MDPI journal article supplement (doi:10.3390/d14121056), 2022-12-01
Supplement: s1 [file s1]

**Table S3a:** AMOVA design and results: for the 16S rDNA sequence marker under different settings (no groupings vs. 3 groups<sup>1</sup>).

| No grouping |                                      |      |                |                     |                         | 3 groups                                                            |      |                |                     |                         |
|-------------|--------------------------------------|------|----------------|---------------------|-------------------------|---------------------------------------------------------------------|------|----------------|---------------------|-------------------------|
|             | Source of variation                  | d.f. | Sum of squares | Variance components | Percentage of variation | Source of variation                                                 | d.f. | Sum of squares | Variance components | Percentage of variation |
| Alignment 1 | Among populations                    | 6    | 101.43         | 2.66                | 80.80                   | Among groups                                                        | 2    | 84.01          | 2.53                | 62.83                   |
|             | Within populations                   | 42   | 26.55          | 0.63                | 19.20                   | Among populations within groups                                     | 4    | 17.42          | 0.86                | 21.45                   |
|             | Total                                | 48   | 127.98         | 3.29                |                         | Within populations                                                  | 42   | 26.55          | 0.63                | 15.72                   |
|             | <b>Fixation Index</b><br>FST: 0.81** |      |                |                     |                         | Total                                                               | 48   | 127.98         | 4.02                |                         |
| Alignment 2 | Among populations                    | 5    | 195.92         | 6.97                | 96.75                   | <b>Fixation Indices</b><br>FSC: 0.58**<br>FST: 0.84**<br>FCT: 0.63  |      |                |                     |                         |
|             | Within populations                   | 33   | 7.72           | 0.23                | 2.25                    | Among groups                                                        | 2    | 176.46         | 6.70                | 77.28                   |
|             | Total                                | 38   | 203.64         | 7.20                |                         | Among populations within groups                                     | 3    | 19.47          | 1.73                | 20.02                   |
|             | <b>Fixation Index</b><br>FST: 0.97** |      |                |                     |                         | Within populations                                                  | 33   | 7.72           | 0.23                | 2.7                     |
| Alignment 3 | Among populations                    | 6    | 741.52         | 6.53                | 93.53                   | Total                                                               | 38   | 203.64         | 8.66                |                         |
|             | Within populations                   | 138  | 42.23          | 0.31                | 4.47                    | <b>Fixation Indices</b><br>FSC: 0.88**<br>FST: 0.97**<br>FCT: 0.77* |      |                |                     |                         |
|             | Among populations                    | 6    | 741.52         | 6.53                | 93.53                   | Among groups                                                        | 2    | 590.26         | 5.45                | 66.14                   |
|             | Within populations                   | 138  | 42.23          | 0.31                | 4.47                    | Among populations within groups                                     | 4    | 151.26         | 2.48                | 30.15                   |

|                       |     |        |      |  |                         |     |        |      |      |
|-----------------------|-----|--------|------|--|-------------------------|-----|--------|------|------|
|                       |     |        |      |  | Within populations      | 138 | 42.23  | 0.31 | 3.72 |
| Total                 | 144 | 783.75 | 6.84 |  | Total                   | 144 | 783.75 | 8.23 |      |
| <b>Fixation Index</b> |     |        |      |  | <b>Fixation Indices</b> |     |        |      |      |
| FST: 0.96**           |     |        |      |  | FSC: 0.89**             |     |        |      |      |
|                       |     |        |      |  | FST: 0.96**             |     |        |      |      |
|                       |     |        |      |  | FCT: 0.66**             |     |        |      |      |

**Table S3b:** AMOVA design and results: for the CO1 sequence marker under different settings (no groupings vs. 3 groups<sup>1</sup>).

| No grouping |                       |      |                |                     |                         | 3 groups                        |      |                |                     |                         |
|-------------|-----------------------|------|----------------|---------------------|-------------------------|---------------------------------|------|----------------|---------------------|-------------------------|
|             | Source of variation   | d.f. | Sum of squares | Variance components | Percentage of variation | Source of variation             | d.f. | Sum of squares | Variance components | Percentage of variation |
| Alignment 2 | Among populations     | 6    | 285.80         | 12.99               | 98.90                   | Among groups                    | 2    | 248.94         | 15.51               | 85.42                   |
|             | Within populations    | 22   | 3.17           | 0.14                | 1.10                    | Among populations within groups | 4    | 36.86          | 2.50                | 13.78                   |
|             |                       |      |                |                     |                         | Within populations              | 22   | 3.17           | 0.14                | 0.79                    |
|             | Total                 | 28   | 288.97         | 13.14               |                         | Total                           | 28   | 288.97         | 18.16               |                         |
|             | <b>Fixation Index</b> |      |                |                     |                         | <b>Fixation Indices</b>         |      |                |                     |                         |
|             | FST: 0.99**           |      |                |                     |                         | FSC: 0.95**                     |      |                |                     |                         |
|             |                       |      |                |                     |                         | FST: 0.99**                     |      |                |                     |                         |
|             |                       |      |                |                     |                         | FCT: 0.85*                      |      |                |                     |                         |
| Alignment 3 | Among populations     | 6    | 1430.61        | 13.59               | 98.58                   | Among groups                    | 2    | 1289.57        | 14.36               | 83.62                   |
|             | Within populations    | 128  | 24.98          | 0.20                | 1.42                    | Among populations within groups | 4    | 141.04         | 2.62                | 15.24                   |
|             |                       |      |                |                     |                         | Within populations              | 128  | 24.98          | 0.20                | 1.14                    |
|             | Total                 | 134  | 1455.59        | 13.79               |                         | Total                           | 134  | 1455.59        | 17.18               |                         |

**Fixation Index**

FST: 0.99\*\*

**Fixation Indices**

FSC: 0.93\*\*

FST: 0.99\*\*

FCT: 0.84\*

---

\* significance level = 0.05

<sup>1</sup> Groups (if applicable) Group 1: Biosphere Reserve Los Tuxtlas, Mexico (RBLT); Group 2: Cusuco National Park, Honduras (HN), Nicaragua (NI-b), Biological Research Station La Selva, Costa Rica (LS), Barro Colorado Island, Panama (BCI), Rio Canande Reserve, Ecuador (CAN); Group 3: Nicaragua (NI), Corcovado National Park 'Field Station Sirena', Costa Rica (CNP)

---
