# Supplementary material for: The Quality of Sequence Data Affects Biodiversity and Conservation Perspectives in the Neotropical Damselfly Megaloprepus caerulatus
Source: MDPI journal article supplement (doi:10.3390/d14121056), 2022-12-01
Supplement: s1 [file s1]

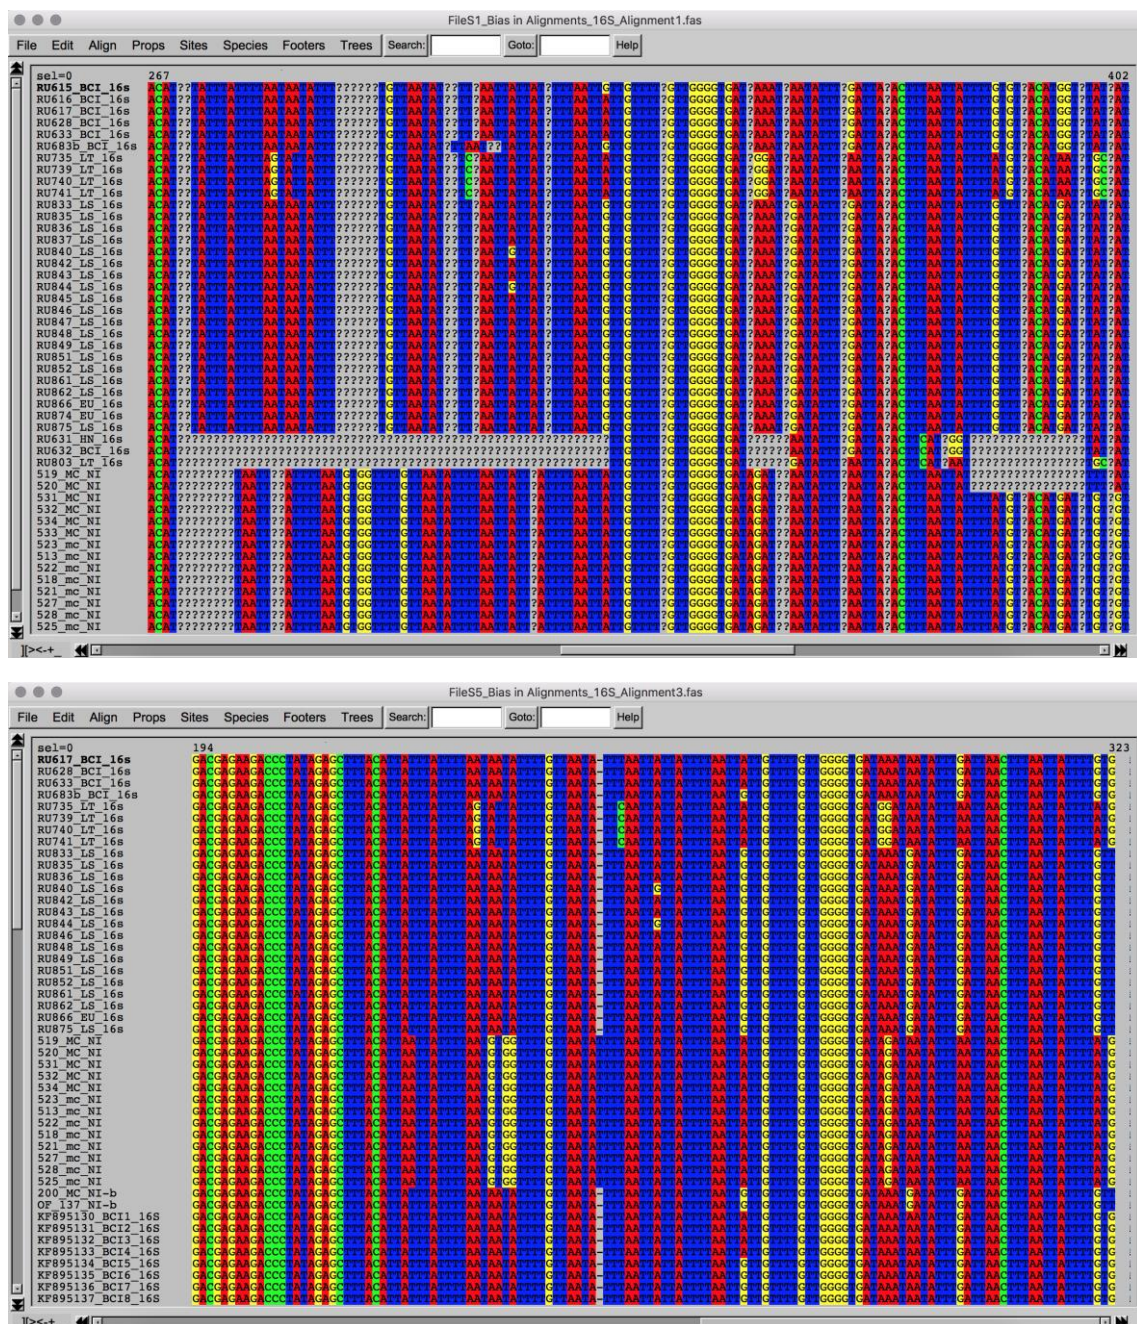

**Figure S1.** Screenshots of the 16S rDNA Alignment 1 (above) and 16S rDNA Alignment 3 (down).





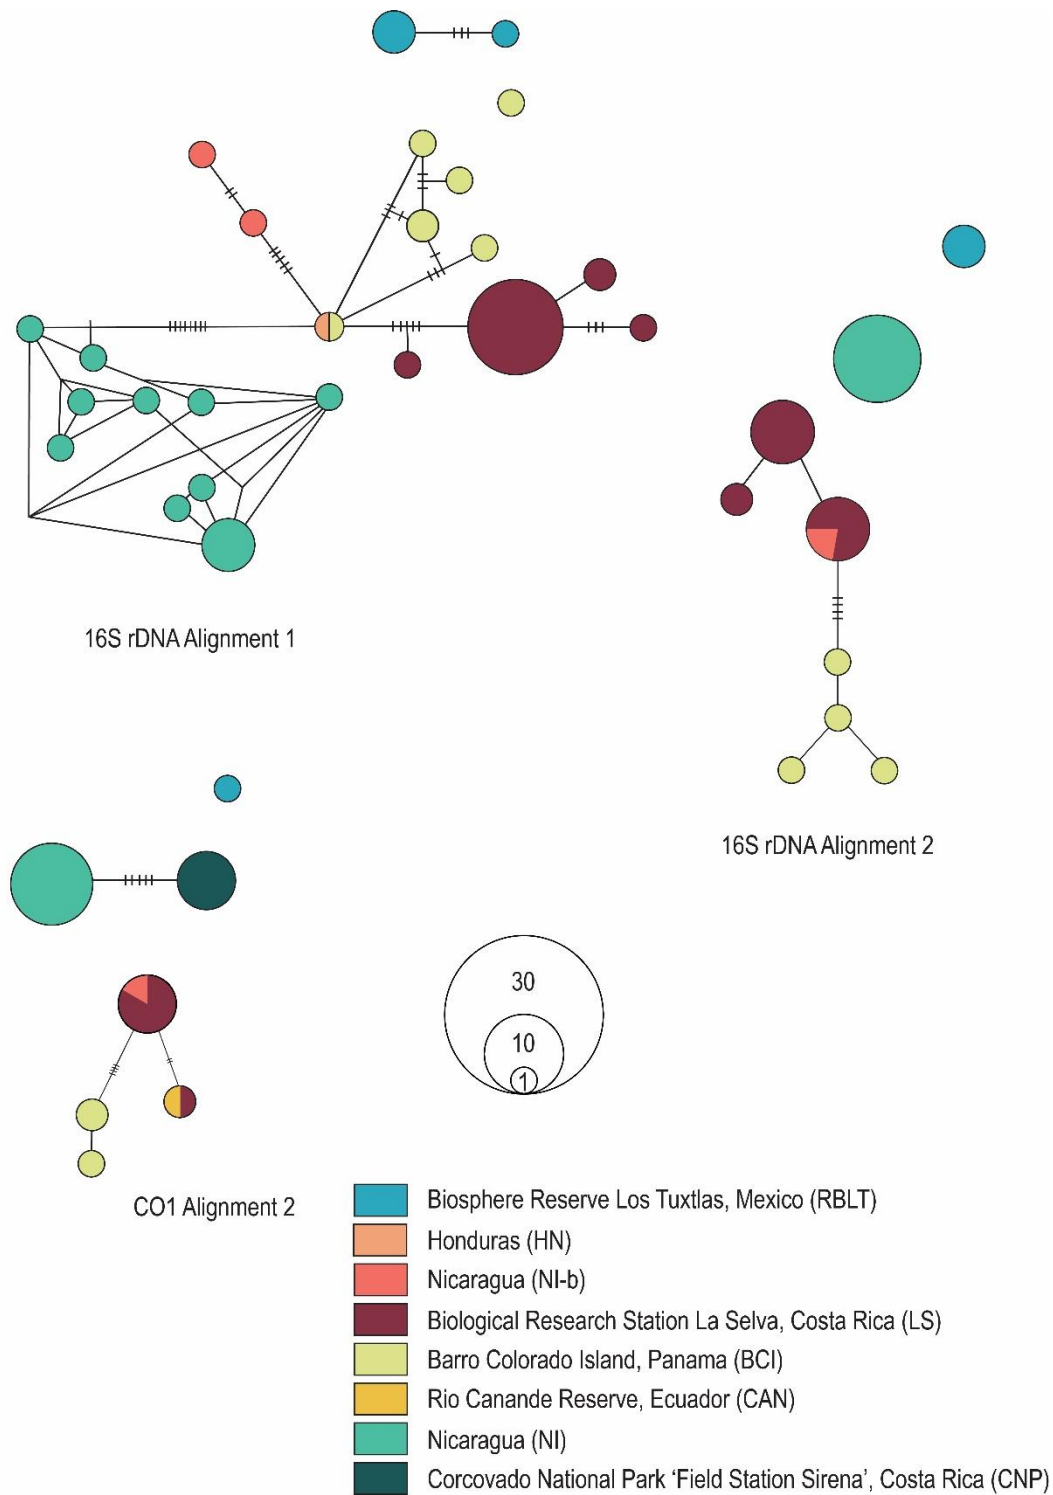

**Figure S3.** Genealogical relationships among *Megaloprepus* populations for the 16S rDNA Alignment 1 and 2, and the CO1 Alignment 2 based on statistical parsimony (95% connection limit) in TCS vers. 1.2.1. Populations are color coded according to their origin.

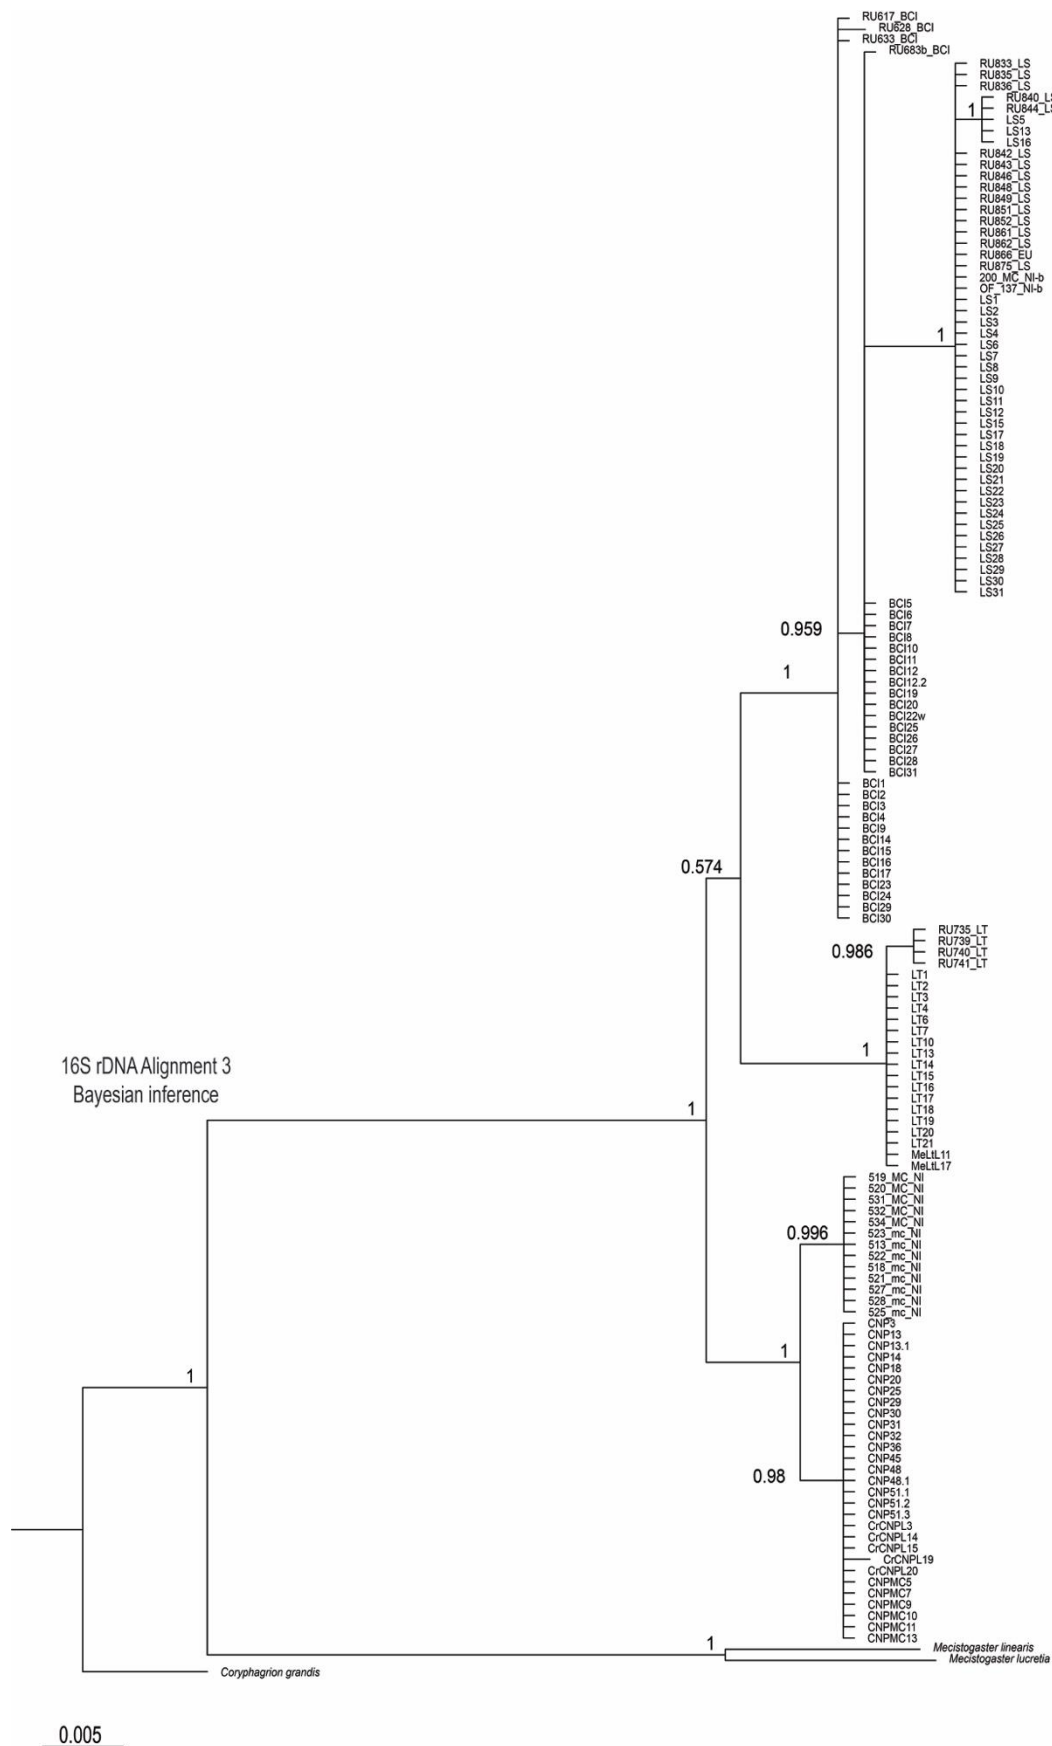

**Figure S4.** Phylogeny based on Bayesian inference using MrBayes vers. 3.7 for 16S rDNA Alignment3 the with posterior probabilities shown on the corresponding nodes. *Coryphagrion grandis*, *Mecistogaster linearis* and *Mecistogaster lucretia* are outgroups. For the species IDs please compare Table S1.





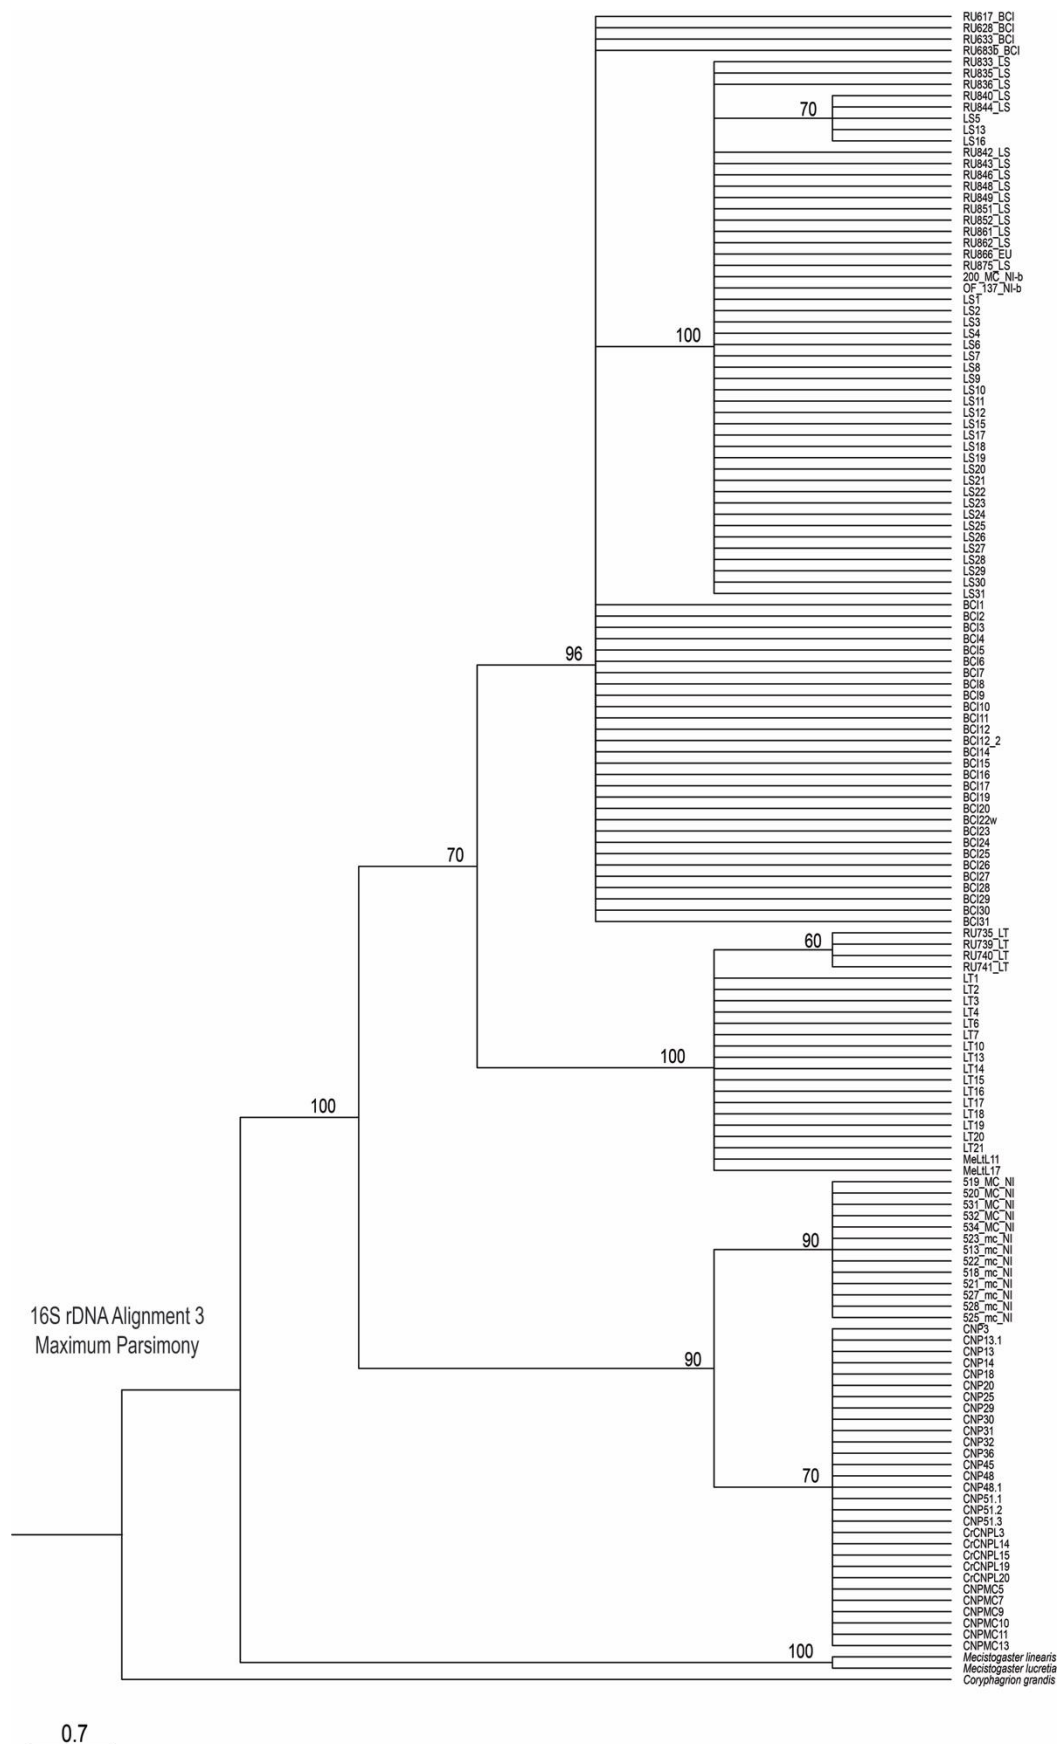

**Figure S6.** Maximum parsimony tree obtained with PAUP\* vers. 4.0b8 for the 16S rDNA Alignment3 with 1000 bootstrap replicates. *Coryphagrion grandis*, *Mecistogaster linearis* and *Mecistogaster lucretia* are outgroups. For the species IDs please compare Table S1.

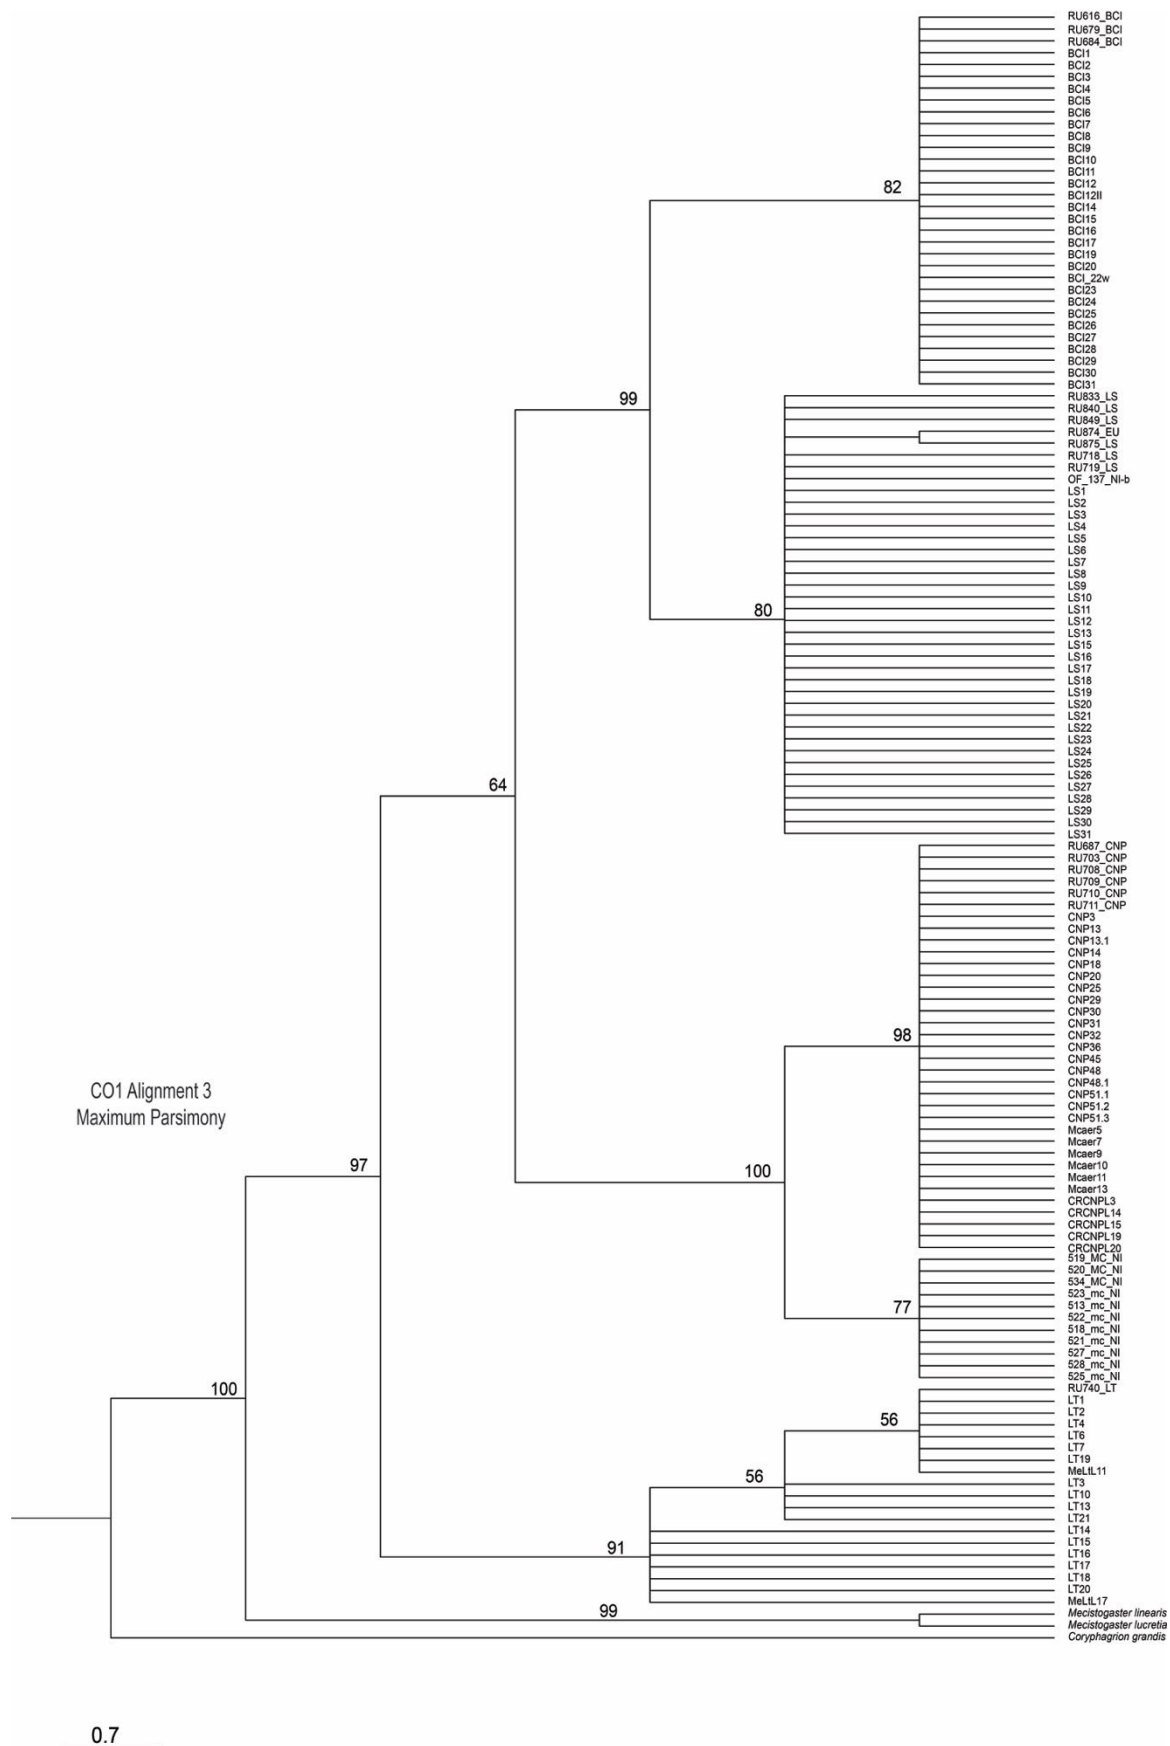

**Figure S7.** Maximum parsimony tree obtained with PAUP\* vers. 4.0b8 for the CO1 Alignment3 with 1000 bootstrap replicates. *Coryphagrion grandis*, *Mecistogaster linearis* and *Mecistogaster lucretia* are outgroups. For the species IDs please compare Table S1.
